# Supplementary material for: AuNRs attached TiO2NPs modified by cobalt-imidazolate frameworks as exceptional materials to improve the energy conversion efficiency of dye-sensitized solar cells
Source: Royal Society of Chemistry journal article supplement (doi:10.1039/d3cp01576a), 2023-01-01
Supplement: d3cp01576a1.pdf [file d3cp01576a1.pdf]

## Supplementary Information

### **AuNRs attached TiO<sub>2</sub> NPs modified by cobalt-imidazolate frameworks as exceptional materials to improve the energy conversion efficiency in dye-sensitized solar cells**

Nafiseh Bagheri,<sup>1</sup> Javad Hassanzadeh,<sup>1</sup> Zainab B Al Ruqeishi,<sup>1</sup> Ninie Suhana Abdul Manan,<sup>2,3</sup>

Haider A.J. Al Lawati,<sup>1</sup> Osama K. Abou-Zied,<sup>1,\*</sup>

<sup>1</sup>*Department of Chemistry, College of Science, Sultan Qaboos University, Box 36, Al-Khod 123,  
Sultanate of Oman*

<sup>2</sup>*Department of Chemistry, Faculty of Science, Universiti Malaya, 50603 Kuala Lumpur,  
Malaysia*

<sup>3</sup>*University of Malaya Centre for Ionic Liquids (UMCiL), Universiti Malaya, 50603 Kuala  
Lumpur, Malaysia*

\* Corresponding author. E-mail: abouzied@squ.edu.om

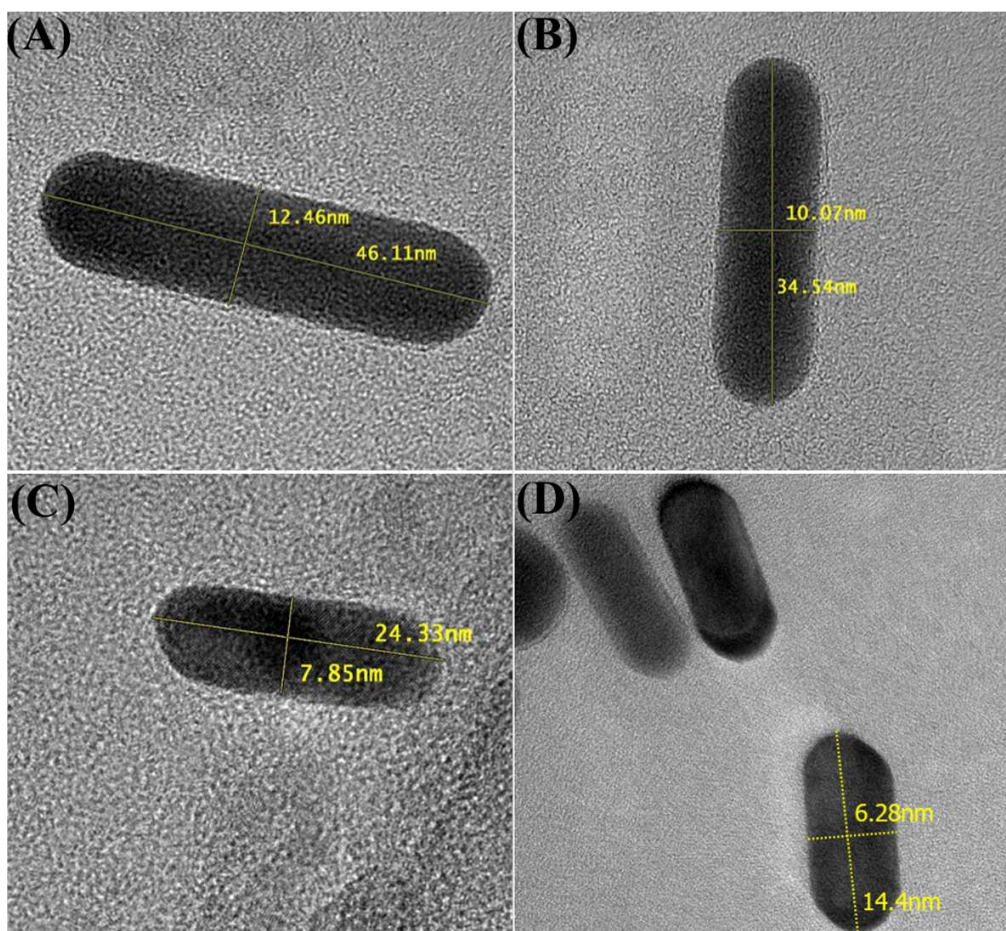

**Fig. S1.** TEM images of the synthesized AuNRs with different aspect ratios: A) 3.7, B) 3.4, C) 3.1, and D) 2.3.

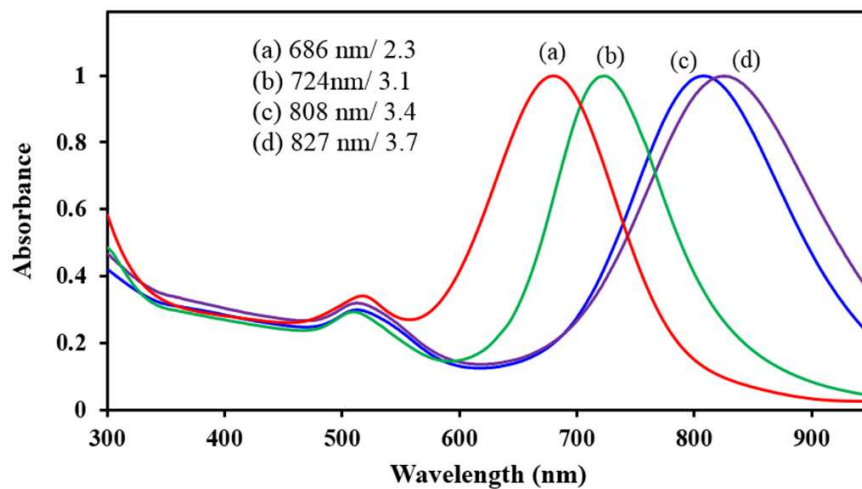

Fig. S2. Absorption spectra of the synthesized AuNRs with different aspect ratios.

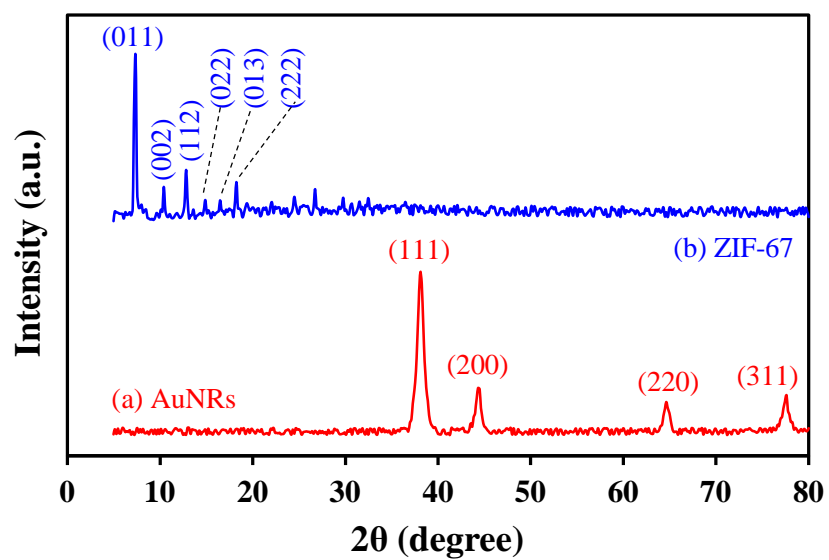

Fig. S3. XRD patterns of (a) AuNRs with aspect ratio of 3.4, (b) ZIF-67.

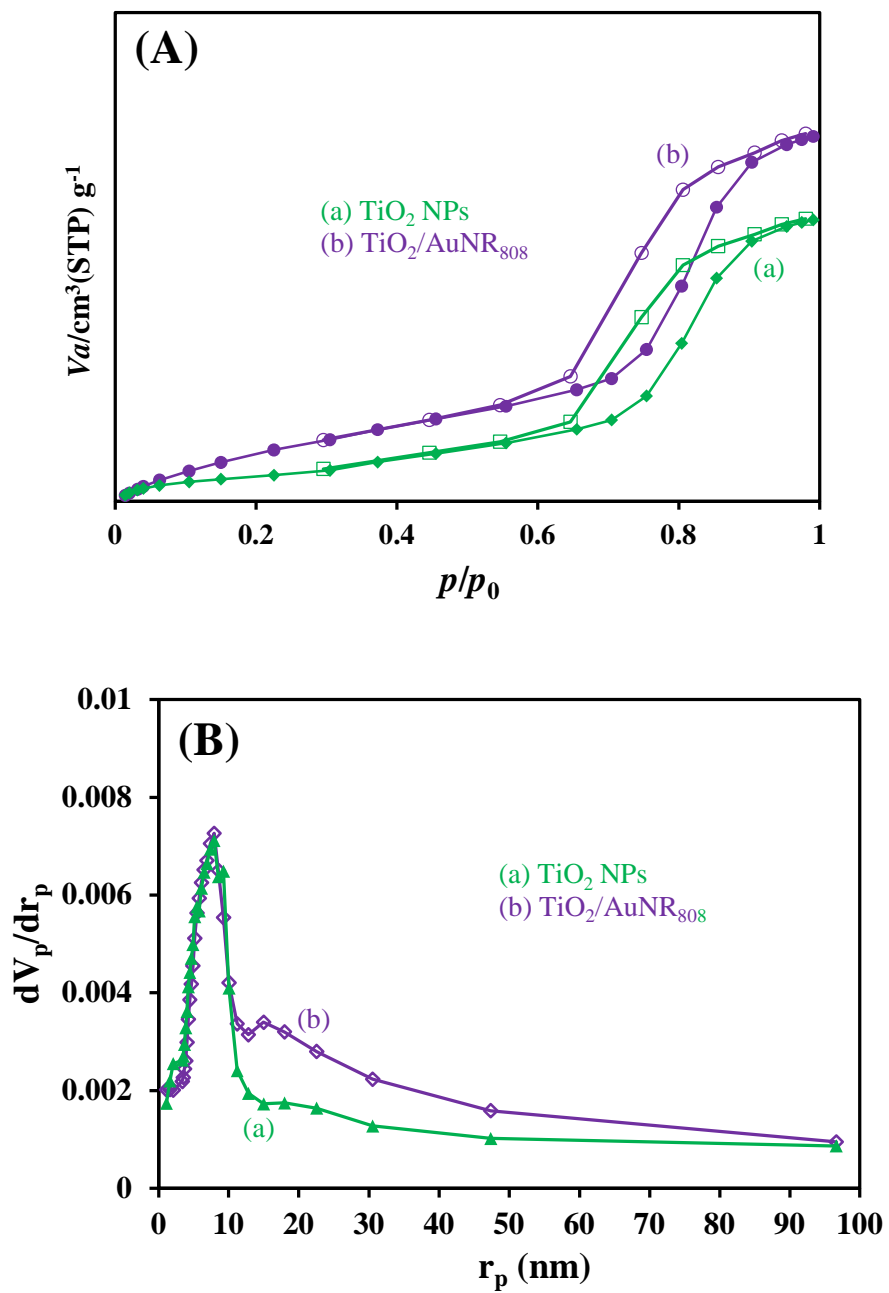

**Fig. S4.** A) N<sub>2</sub> adsorption-desorption isotherms and B) pore-size distribution for TiO<sub>2</sub> NPs (a) and TiO<sub>2</sub>/AuNR<sub>808</sub>

(b).

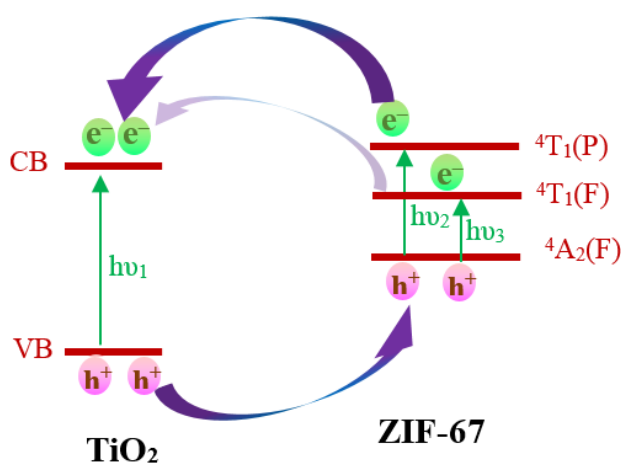

**Fig. S5.** The schematic representation of energy diagram of ZIF-67 ( $T_d$ ) and electron transferring to conduction band of  $TiO_2$ .

**Table S1.** Photovoltaic parameters of the fabricated DSSCs with photoanodes modified by  $TiO_2/AuNR_{808}/ZIF$  nanocomposite with different percentage of ZIF-67, sensitized with N719 dye under simulated AM 1.5G solar irradiation of  $100\text{ mW cm}^{-2}$

| Percentage of ZIF-67 | $V_{oc}$ (V) | $J_{sc}$ ( $\text{mA cm}^{-2}$ ) | $P_{max}$ (mW) | FF    | $\eta\%$ |
|----------------------|--------------|----------------------------------|----------------|-------|----------|
| 4%                   | 0.75         | 10.168                           | 0.871          | 0.457 | 3.484    |
| 6%                   | 0.76         | 14.792                           | 1.482          | 0.527 | 5.928    |
| 8%                   | 0.8          | 18.804                           | 2.09385        | 0.557 | 8.3754   |
| 10%                  | 0.81         | 16.232                           | 1.9173         | 0.583 | 7.6692   |
| 12%                  | 0.81         | 12.06                            | 1.49105        | 0.611 | 5.9642   |
